# Supplementary figures and images for: Magnitude, Associated Risk Factors, and Trend Comparisons of Urinary Tract Infection among Pregnant Women and Diabetic Patients: A Systematic Review and Meta-Analysis
Source: Hindawi journal article supplement (doi:10.1155/2023/8365867), 2023-07-28

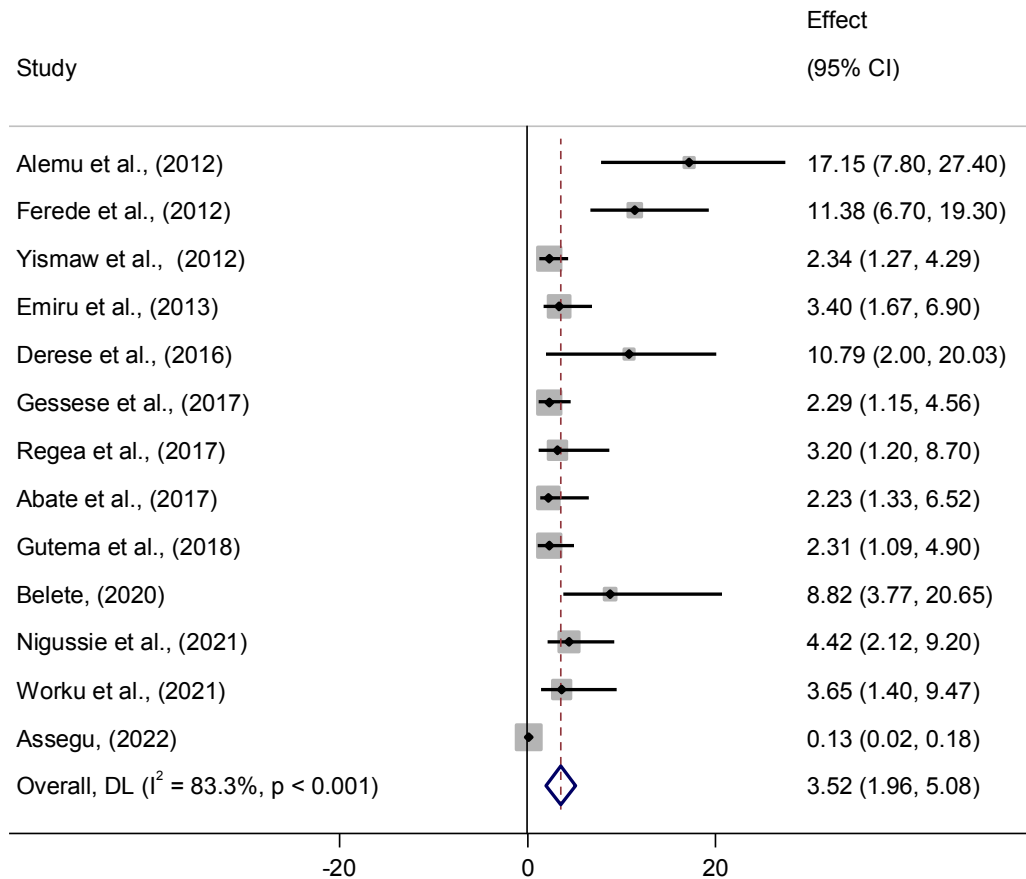

**S3:** Previous history of UTI as an associated risk factor for UTI among DM and PW patients

Supplement: f1 [file 8365867.f1.zip]

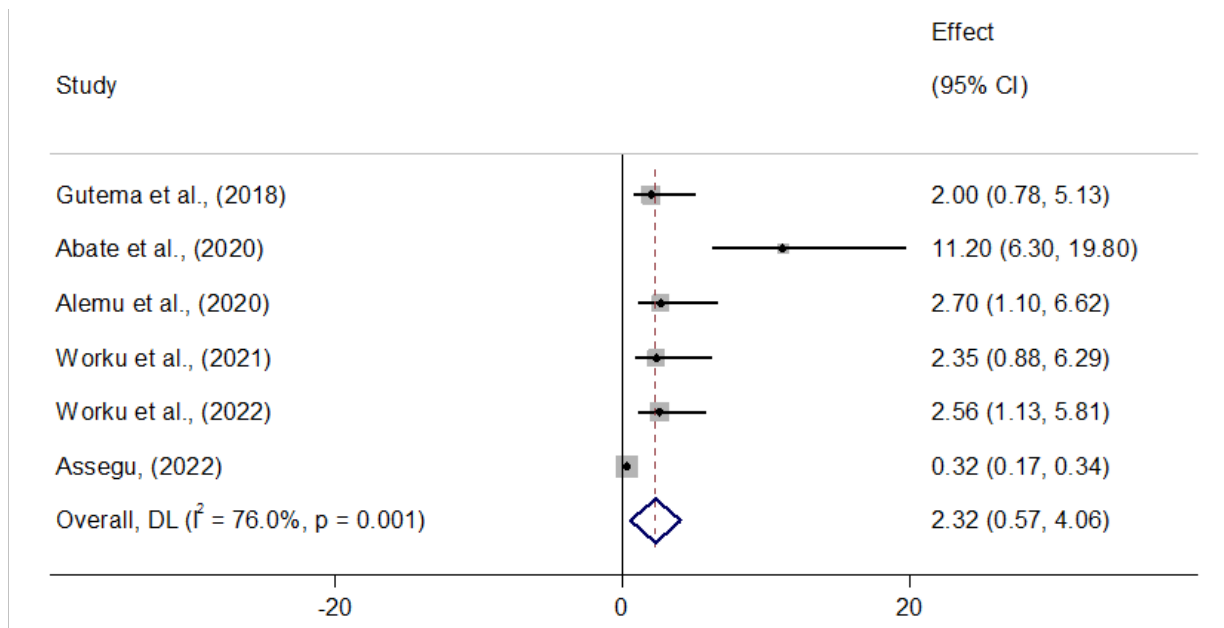

**S4:** Current symptoms of UTI as an associated risk factor for UTI among DM and PW patients.

Supplement: f1 [file 8365867.f1.zip]

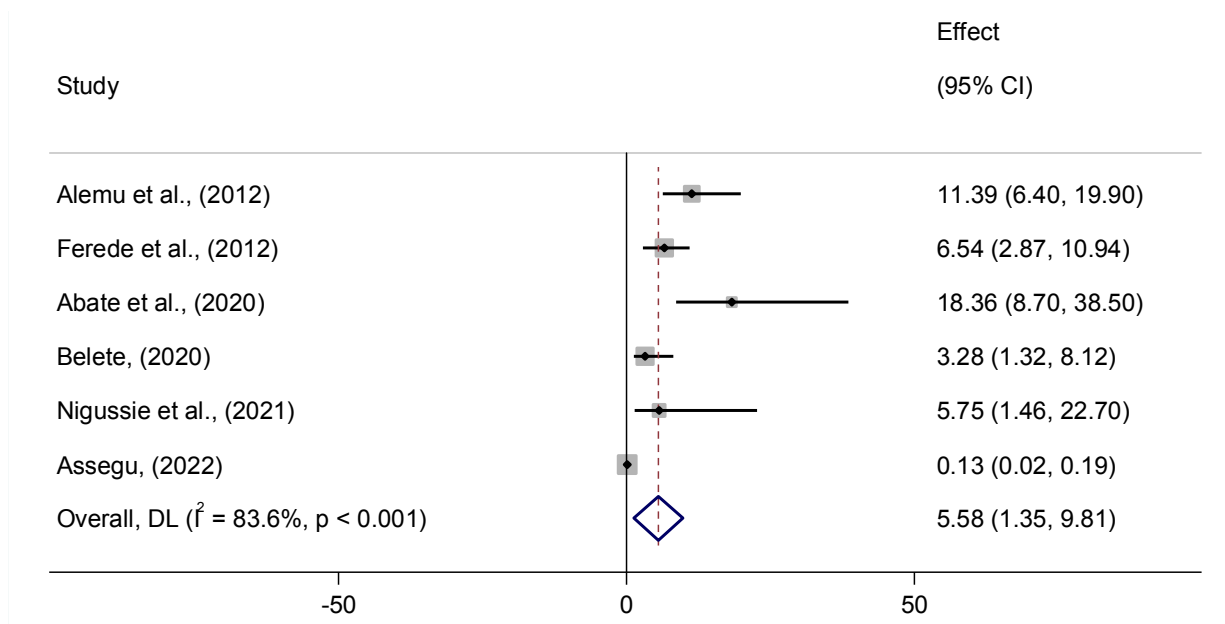

**S5:** History of catheterization as an associated risk factor for UTI among DM and PW patients.

Supplement: f1 [file 8365867.f1.zip]

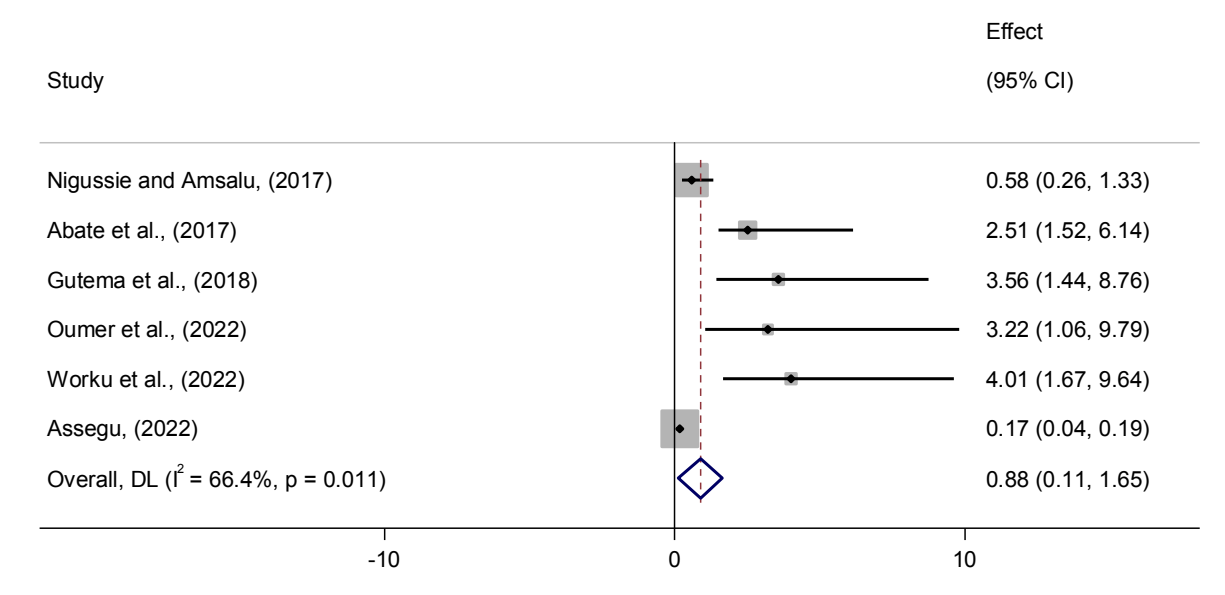

**S1:** Sex as an associated risk factor for UTI among patients with DM

Supplement: f1 [file 8365867.f1.zip]

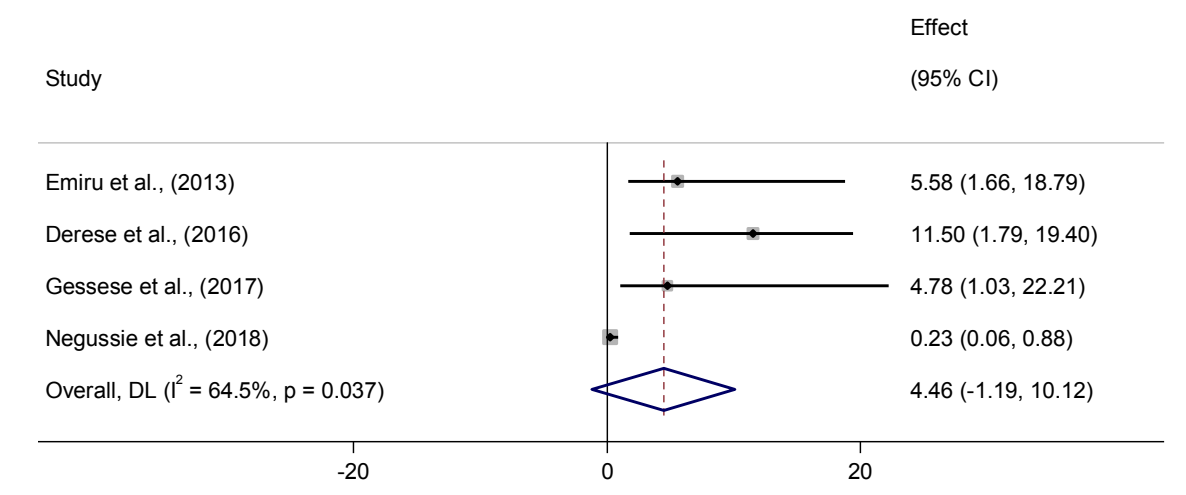

**S2:** Income level as an associated risk factor for UTI among PW patients

Supplement: f1 [file 8365867.f1.zip]
